# Supplementary material for: Computer simulations explain mutation-induced effects on the DNA editing by adenine base editors
Source: PubMed Central journal article supplement — Sci Adv. 2020 Mar 4;6(10):eaaz2309. doi: 10.1126/sciadv.aaz2309 (PMC7056309; doi:10.1126/sciadv.aaz2309), 2020-03-04
Supplement: aaz2309_SM.pdf [file aaz2309_SM.pdf]

## Supplementary Materials for

### Computer simulations explain mutation-induced effects on the DNA editing by adenine base editors

Kartik L. Rallapalli\*, Alexis C. Komor\*, Francesco Paesani\*

\*Corresponding author. Email: krallapa@ucsd.edu (K.L.R.); akomor@ucsd.edu (A.C.K.); fpaesani@ucsd.edu (F.P.)

Published 4 March 2020, *Sci. Adv.* **6**, eaaz2309 (2020)

DOI: 10.1126/sciadv.aaz2309

#### This PDF file includes:

Supplementary Materials and Methods

Fig. S1. Asteroid plot for TadA\*7.10-ssDNA.

Fig. S2. Comparison of the structural flexibility of the TadA monomer with TadA dimer.

Fig. S3. Percentage contact and the fractional H-bonding between the three nucleotides and the first interaction shell amino acids.

Fig. S4. Asteroid plot for TadA\*0.1-ssDNA complex.

Fig. S5. Mutations lead to an increase in TadA\* binding to the ssDNA (AAG).

Fig. S6. Structural importance of Ala<sup>106</sup>Val mutation.

Fig. S7. PMF of the TadA\*-ssDNA complexes calculated using steered MD simulations.

Fig. S8. Comparison of the structural flexibility of the ecTadA with hAPOBEC3A.

Fig. S9. Modeling of TadA\*-ssDNA.

Fig. S10. Umbrella sampling data and biased statistics.

Table S1. Comparison of RMSD of the representative clusters.

Table S2. Summary of the systems modeled and the types of simulations conducted in this study.

Table S3. DNA sequences used for simulations and in mammalian tissue culture experiments.

Table S4. First round genomic DNA PCR sequences.

Supplementary sequences

## Supplementary Materials and Methods

### System setup

The TadA0.1 was constructed using the previously published crystal structure of *E. coli* TadA (PDB ID: 1z3a) (10). All crystallographic water molecules within 3 Å distance of the protein surface were preserved during the modelling process. The wild-type TadA structure was transformed into the ABE monomers using the mutagenesis plug-in available in PyMOL (31). *S. aureus* TadA enzyme (PDB :2b3j) was identified as a structural homologue of *E. coli* TadA using Blastp algorithm (fig. S9). The *ecTadA* and *saTadA* were combined to yield the *ecTadA*-RNA complex. Since the natural substrate of TadA is tRNA anti-codon loop (stem looped secondary structure) and the system of interest contains single stranded DNA (ssDNA), the *ecTadA*-RNA complex was remodeled using steered molecular dynamics (SMD) simulations, to better represent the ABE-ssDNA complex (based on the cryo-EM structure of CRISPR-Cas9 (PDB ID: 5y36) (14). SMD simulation with an external force of 100 kcal/mol Å<sup>2</sup> along the collective variable defined by the distance between the 5' and 3'-terminal bases of RNA hairpin loop. Over a span of 100 ns SMD simulation, the terminal bases were moved 30 Å apart in order to capture the disordered ssDNA using the R-loop as the reference model (fig. S9). The TadA\*0.1-ssDNA complex was mutated to higher TadA\*-ssDNA complexes using the PyMOL mutagenesis tool (31). A similar approach was adopted to generate the modified TadA\*1.2(N108D) and TadA\*2.1(N108D) complex, where Asn108 was reversed back to aspartate. All titratable residues were assigned protonation states predicted using the H++ server at pH 7 (34, 35).

Using the LEap tool from the AmberTools suite (38), the resulting structures of the enzyme and the enzyme-substrate complex were embedded into a pre-equilibrated truncated octahedron box of explicit water molecules, which were described by the TIP3P model (33), with a 10 Å buffer distance. Varying number of Na<sup>+</sup> ions were added to each system to maintain charge neutrality and the simulation cell was then replicated infinitely in three dimensions to impose periodic boundary conditions.

### Molecular dynamics simulations

Molecular dynamics (MD) simulations were performed using the CUDA version of PMEMD of Amber18 in the canonical ensemble (constant number of atoms, temperature, and volume) (39-41). The protein and the DNA atoms were represented using the AMBER ff14SB force field and the *bsc1* parameters, respectively (36-38). The structures were subjected to energy minimization using a combination of steepest descent and conjugate gradient algorithms. A total of 50000 steps were used in the minimization, with the first 2000 steps carried out with the steepest descent algorithm and the remaining 48000 steps carried out with conjugate gradient algorithm. Initial velocities were assigned to all atoms in the system through gradual heating to 298.15 K using Langevin dynamics with a collision frequency of 1 ps<sup>-1</sup>. The equilibration was performed in an isobaric-isothermal (NPT: constant number of atoms, pressure, and temperature) ensemble at 298.15 K and 1 bar, using Langevin dynamics for temperature regulation and a Monte Carlo barostat for pressure control. Both heating and equilibration were carried out with additional harmonic restraints (with a force constant, k, of 2 kcal/mol Å<sup>2</sup>) on all protein and DNA residues. To capture the effects of the neighboring nuclear environment (i.e. Cas9 and the genome), harmonic restraints were imposed on the bases on 5'- and 3'-termini of the substrate DNA sequence during all subsequent simulations. The non-bonded interactions were cut off at 8 Å and

the long-range electrostatics were evaluated using the particle mesh Ewald method. The hydrogen atom bond length was constrained by implementing the SHAKE algorithm. The final snapshots of the 10 ns equilibrating were used to initiate the various biased and unbiased MD production trajectories. All MD simulations were propagated in time using the velocity Verlet with a time step of 2 fs.

#### Steered molecular dynamics and umbrella sampling simulations

The distance between the centers of mass of the protein and the ssDNA was chosen as the collective variable ( $\xi$ ) to monitor the binding and unbinding of the protein-ssDNA complexes. The equilibrated structures were subjected to constant force pulling and pushing along the  $\xi$  value using a 100 kcal/mol  $\text{\AA}^2$  moving harmonic restraint. These steered MD trajectories were used to uniformly change the  $\xi$  value at the rate of 0.1  $\text{\AA}/\text{ns}$  from 19  $\text{\AA}$  to the target values of  $19 \pm 10 \text{\AA}$  over 100 ns (fig. S7).

The initial configurations for seeding the 41 windows ( $\xi \in [10, 30]$ ; step 0.5  $\text{\AA}$ ) of the umbrella sampling (US) simulations were extracted from the SMD trajectories. Each US window was subjected to short equilibration, which was followed by production for 5 ns under umbrella restraints with a force constant,  $k$ , of 20 kcal/mol  $\text{\AA}^2$ . Four independent US simulations were carried out for each of the 41 windows for all the protein-ssDNA complexes, which were then used to determine the potentials of mean force (PMFs) representing the free energy profiles associated with the protein-ssDNA binding process along  $\xi$ . Hence, a total of 820 ns (20 ns  $\times$  41 windows) was sampled for each complex, which was found enough to converge the PMFs. Table S2 lists all the systems that were modelled along with the corresponding type of simulation that was performed.

#### Calculations of binding free energy and error bars

The US simulations led to the accumulation of 100000 values of the instantaneous reaction coordinate in each of the 41 windows along the collective variable  $\xi$  describing the protein-DNA binding process. This raw data (fig. S10) represents the biased probability distribution along  $\xi$ . The WHAM algorithm was then used with a convergence threshold of  $10^{-8}$  to obtain the unbiased probability distribution and subsequently derive the actual PMF along  $\xi$  (42). The standard deviation associated with 4 independent PMF profiles was calculated to estimate the error in convergence due to sampling. Additional error analysis was performed using the block averaging method to evaluate the uncertainty associated with the normalization procedure implemented within WHAM algorithm (43).

#### Analysis protocol

The structural parameters of the protein and protein-DNA complexes during the unbiased MD simulations were analyzed using the cpptraj tool (17, 18). To measure the spatial extent of motion of each residue of the apo-proteins and to determine the effects of individual mutations on the overall structure of the protein, an RMS mass-weighted calculation was carried out on the entire 500 ns trajectory, using the initial frame as a reference. We performed hierarchical agglomerative clustering of the 250000 trajectory snapshots of the unbiased MD simulations of each of the ABE models using the position of  $C\alpha$  atoms. Clusters representing highly similar poses were merged using the group average method for clustering implemented in cpptraj. This yielded a total of 10 representative conformations for each TadA\* models (Fig. 2, table S1). We defined the primary interaction shell as a shell of 4  $\text{\AA}$  radius around the target A and its 5'- and

3'-flanking bases. Protein residues in this primary interaction shell were identified by analyzing the unbiased MD trajectories using cpptraj with distance-based mask of 4 Å around the three bases in the active site. The atom-list per frame data obtained using the cpptraj module was re-normalized to give the percentage residue contacts, using the following formula (Fig. 3, fig. S3)

$$\text{Percentage contact} = \frac{\text{Total atomic contact during all frames} \times 100}{\text{Number of atoms in the amino acid} \times \text{Total number of frames}}$$

The average number of hydrogen-bonding interactions between the residues in the primary interaction shell and the substrate DNA was computed using the `hbond` feature in cpptraj with the default hydrogen-bond definition (3 Å distance between donor and acceptor atoms, and 135° angle between the donor, hydrogen, and acceptor atoms). The second shell residues were identified within a 4 Å distance of all the residues of the first shell, and the associated percentage contacts were calculated in a manner similar to that described for residues in the primary interaction shell (Fig. 4, fig. S1A and S4). The PDB2PQR webserver in conjunction with the APBS server was used to calculate the electrostatic maps for the TadA\*0.1 and TadA\*2.1 models (44) (fig. S4 and S4C). The visualization of the biomolecular trajectories was rendered using Chimera (32) and the data was plotted using Matplotlib (45).

## Supplementary Figures

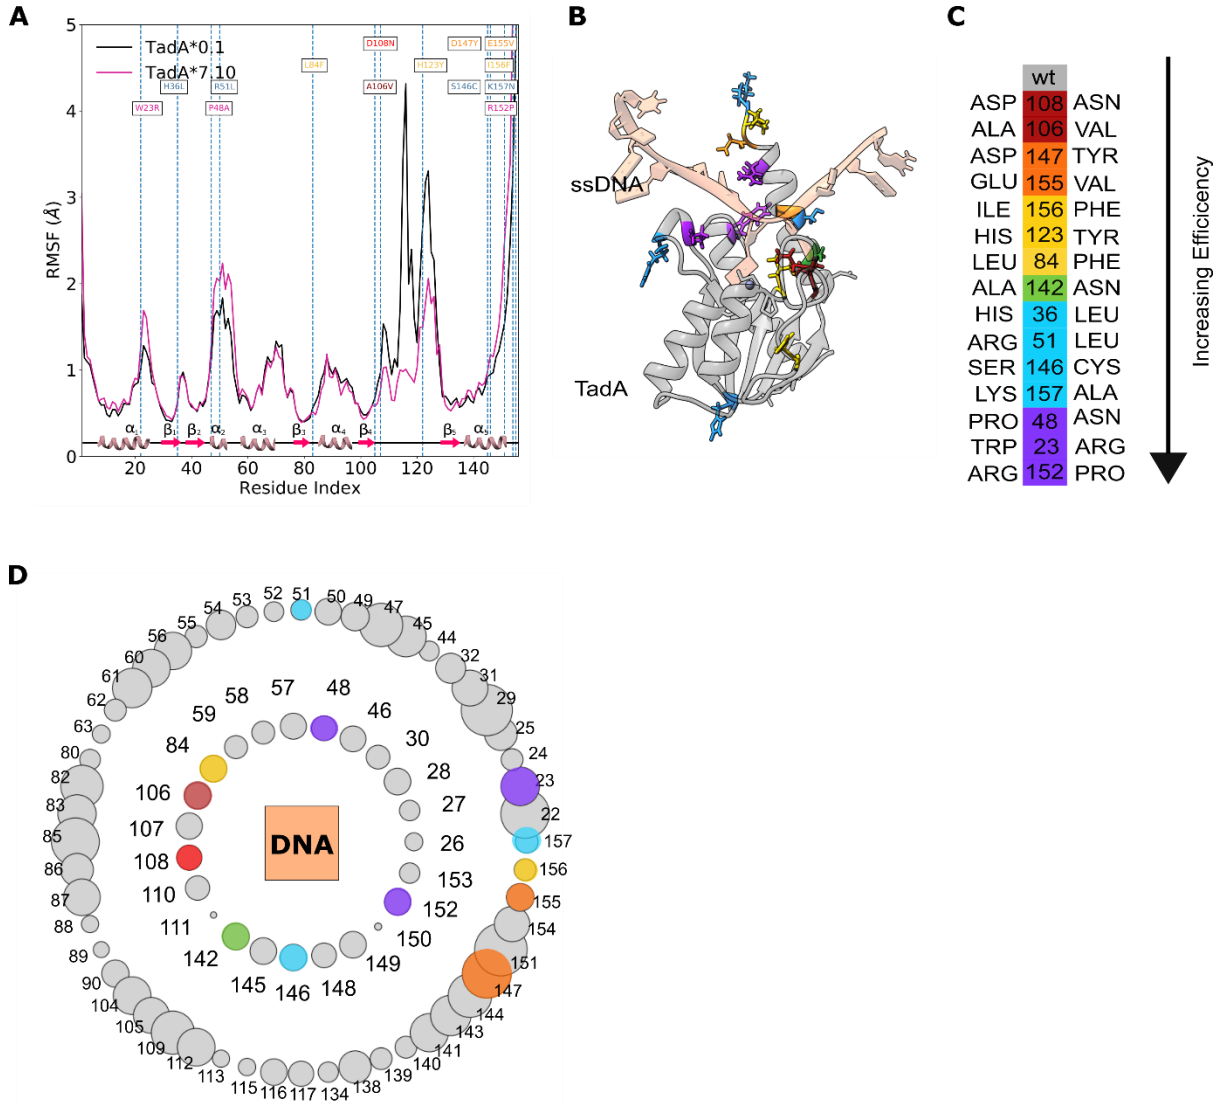

**Fig. S1. Asteroid plot for TadA\*7.10-ssDNA.** (A) The root mean squared fluctuations (RMSFs) as a function of the residues of each of the TadA\*7.10 compared to the TadA\*0.1. (B) The residues that were mutated during the 7 rounds of directed evolution highlighted as sticks on the structure of TadA\* protein and color-coded as per (C). (D) The first and second interaction shell of around the 3 nucleotides in the active site of the TadA\*7.10-ssDNA complex. The size of the nodes corresponds to the time for which the amino acid resides in the first/second shell for the TadA\*0.1-ssDNA simulations.

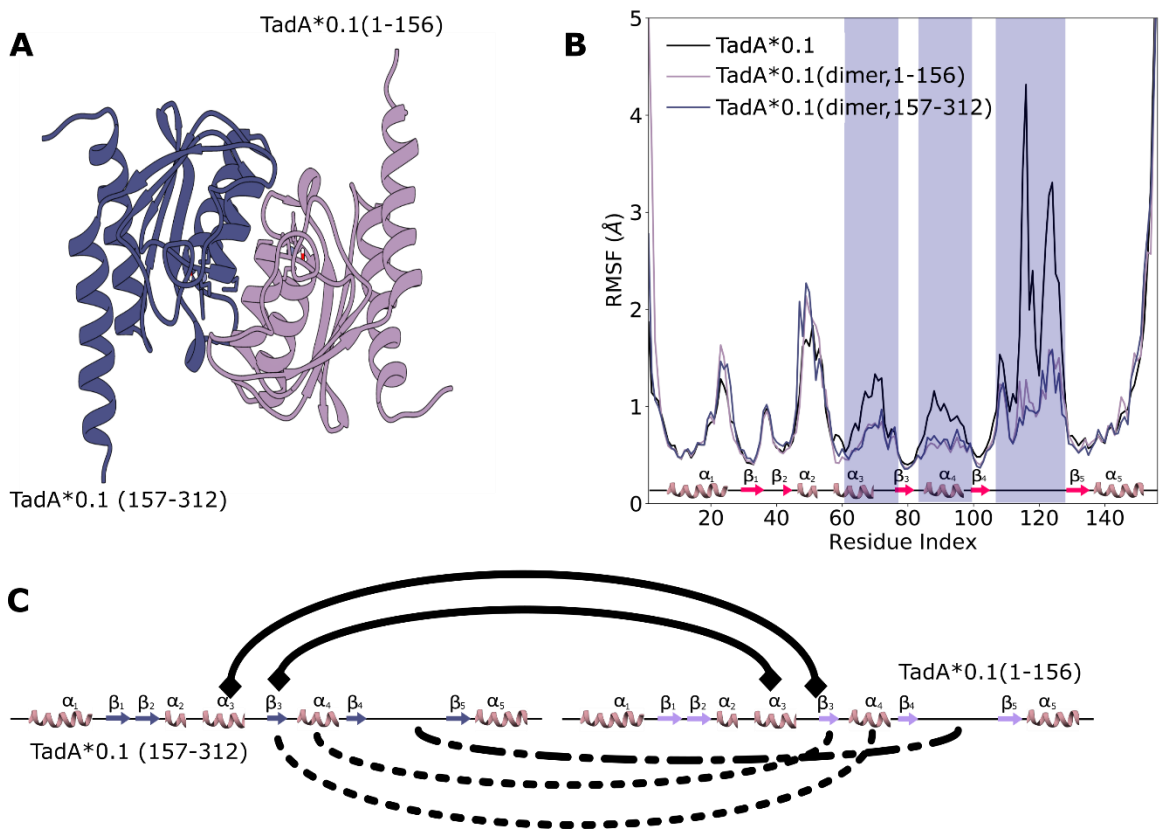

**Fig. S2. Comparison of the structural flexibility of the TadA monomer with TadA dimer.** (A) Structure of TadA dimer highlighting the monomeric subunits. (B) The root mean squared fluctuations (RMSFs) as a function of the residues of each of the TadA monomer compared to the monomeric subunits of TadA dimer. (C) The schematic diagram of the TadA dimer highlighting the regions that serve as the dimerization interface and undergo the most change in structural dynamics upon dimerization.

**A**

|     |                    |                 |              |
|-----|--------------------|-----------------|--------------|
| 26  | 45                 | 0.2             | 0.1          |
| 27  | 59                 | 0.0             | 0.0          |
| 28  | 100                | 0.0             | 0.0          |
| 30  | 79                 | 0.0             | 0.0          |
| 46  | 94                 | 0.3             | 0.3          |
| 48  | 87                 | 0.0             | 0.0          |
| 57  | 95                 | 0.1             | 0.1          |
| 58  | 73                 | 0.0             | 0.0          |
| 59  | 74                 | 0.2             | 0.0          |
| 84  | 99                 | 0.0             | 0.0          |
| 106 | 97                 | 0.0             | 0.0          |
| 107 | 97                 | 0.8             | 0.1          |
| 108 | 90                 | 0.0             | 0.0          |
| 110 | 83                 | 0.0             | 0.7          |
| 111 | 6                  | 0.0             | 0.0          |
| 142 | 100                | 0.0             | 0.0          |
| 145 | 100                | 0.0             | 0.0          |
| 146 | 99                 | 0.0             | 0.8          |
| 148 | 86                 | 0.0             | 0.0          |
| 149 | 100                | 0.0             | 0.0          |
| 150 | 7                  | 0.0             | 0.0          |
| 152 | 97                 | 0.0             | 0.7          |
| 153 | 58                 | 0.0             | 0.6          |
|     | Percentage Contact | H-bond acceptor | H-bond donor |

**B**

|     |                    |                 |              |
|-----|--------------------|-----------------|--------------|
| 26  | 66                 | 0.2             | 0.0          |
| 27  | 72                 | 0.1             | 0.0          |
| 28  | 100                | 0.0             | 0.0          |
| 30  | 46                 | 0.0             | 0.0          |
| 46  | 48                 | 0.1             | 0.2          |
| 48  | 21                 | 0.0             | 0.0          |
| 57  | 31                 | 0.0             | 0.0          |
| 58  | 31                 | 0.0             | 0.0          |
| 59  | 38                 | 0.3             | 0.0          |
| 84  | 100                | 0.0             | 0.0          |
| 106 | 98                 | 0.0             | 0.0          |
| 107 | 99                 | 0.7             | 0.0          |
| 108 | 100                | 0.1             | 1.0          |
| 110 | 96                 | 0.0             | 0.7          |
| 111 | 56                 | 0.0             | 0.0          |
| 142 | 99                 | 0.0             | 0.0          |
| 145 | 99                 | 0.0             | 0.0          |
| 146 | 94                 | 0.0             | 0.0          |
| 148 | 86                 | 0.0             | 0.0          |
| 149 | 94                 | 0.0             | 0.0          |
| 150 | 3                  | 0.0             | 0.0          |
| 152 | 94                 | 0.0             | 0.7          |
| 153 | 57                 | 0.0             | 0.6          |
|     | Percentage Contact | H-bond acceptor | H-bond donor |

|     | Percentage Contact | H-bond acceptor | H-bond donor |
|-----|--------------------|-----------------|--------------|
| 26  | 57                 | 0.1             | 0.0          |
| 27  | 68                 | 0.3             | 0.0          |
| 28  | 100                | 0.0             | 0.0          |
| 30  | 51                 | 0.0             | 0.0          |
| 46  | 56                 | 0.0             | 0.1          |
| 48  | 27                 | 0.0             | 0.0          |
| 57  | 43                 | 0.1             | 0.0          |
| 58  | 30                 | 0.0             | 0.0          |
| 59  | 52                 | 0.1             | 0.0          |
| 84  | 98                 | 0.0             | 0.0          |
| 106 | 96                 | 0.0             | 0.0          |
| 107 | 96                 | 0.6             | 0.0          |
| 108 | 99                 | 0.0             | 0.7          |
| 110 | 75                 | 0.0             | 0.6          |
| 111 | 17                 | 0.0             | 0.0          |
| 142 | 53                 | 0.0             | 0.0          |
| 145 | 77                 | 0.0             | 0.0          |
| 146 | 45                 | 0.0             | 0.0          |
| 148 | 97                 | 0.0             | 0.0          |
| 149 | 97                 | 0.0             | 0.0          |
| 150 | 0                  | 0.0             | 0.0          |
| 152 | 98                 | 0.0             | 1.0          |
| 153 | 30                 | 0.0             | 0.3          |

  

|     | Percentage Contact | H-bond acceptor | H-bond donor |
|-----|--------------------|-----------------|--------------|
| 26  | 71                 | 0.0             | 0.0          |
| 27  | 91                 | 0.6             | 0.0          |
| 28  | 100                | 0.0             | 0.0          |
| 30  | 91                 | 0.0             | 0.0          |
| 46  | 91                 | 0.0             | 0.1          |
| 48  | 33                 | 0.0             | 0.0          |
| 57  | 84                 | 0.0             | 0.0          |
| 58  | 51                 | 0.0             | 0.0          |
| 59  | 90                 | 0.7             | 0.0          |
| 84  | 93                 | 0.0             | 0.0          |
| 106 | 99                 | 0.0             | 0.0          |
| 107 | 96                 | 0.8             | 0.0          |
| 108 | 100                | 0.0             | 1.4          |
| 110 | 95                 | 0.0             | 0.8          |
| 111 | 80                 | 0.0             | 0.0          |
| 142 | 69                 | 0.0             | 0.0          |
| 145 | 76                 | 0.0             | 0.0          |
| 146 | 70                 | 0.0             | 0.3          |
| 148 | 99                 | 0.0             | 0.0          |
| 149 | 100                | 0.0             | 0.0          |
| 150 | 38                 | 0.0             | 0.5          |
| 152 | 96                 | 0.0             | 0.4          |
| 153 | 91                 | 0.0             | 1.6          |

**Fig. S3. Percentage contact and the fractional H-bonding between the three nucleotides and the first interaction shell amino acids.** For (A) TadA\*0.1, (B) TadA\*1.1, (C) TadA\*1.2 and (D) TadA\*2.1. The cells are colour coded as per the generation in which the mutations were identified and the intensity of the colours in the columns signifies the magnitude of the percentage contact and the H-bonding strength.



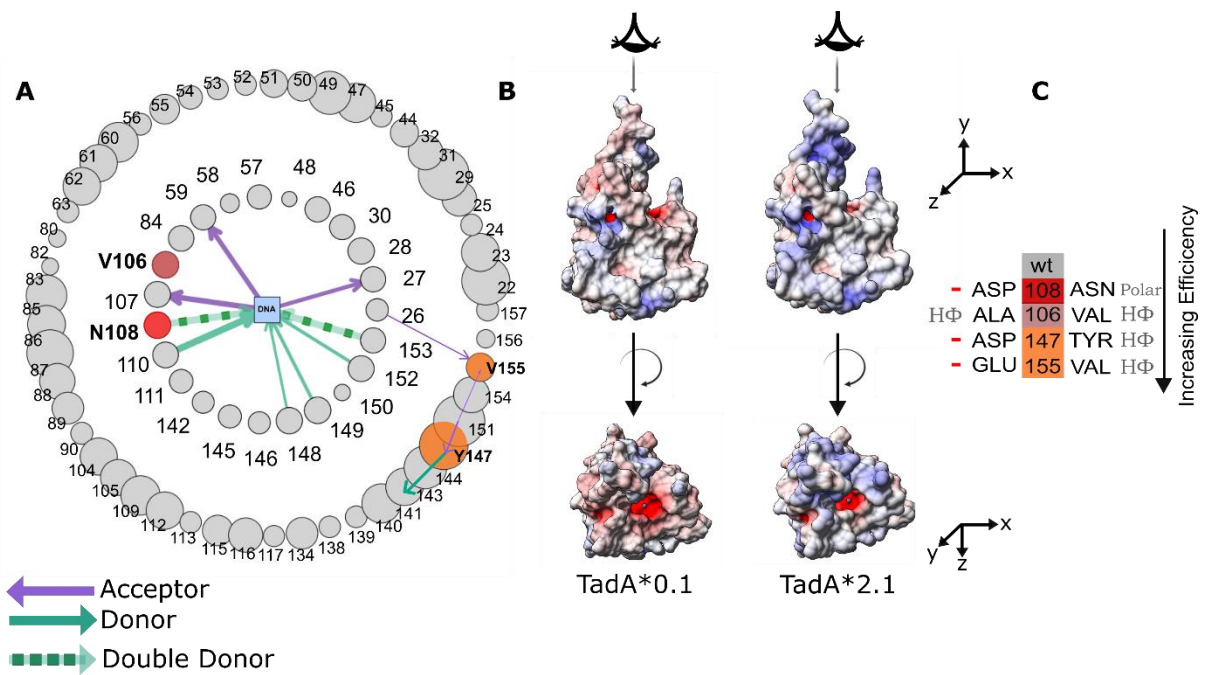

**Fig. S4. Asteroid plot for TadA\*0.1-ssDNA complex.** (A) The first and second interaction shell of around the 3 nucleotides in the active site of the TadA\*0.1-ssDNA complex. The size of the nodes corresponds to the time for which the amino acid resides in the first/second shell. (B) Electrostatic map of TadA\*0.1 and TadA\*2.1. (C) The chemical nature of the mutations that were introduced in the TadA\* during the first two rounds of directed evolution.

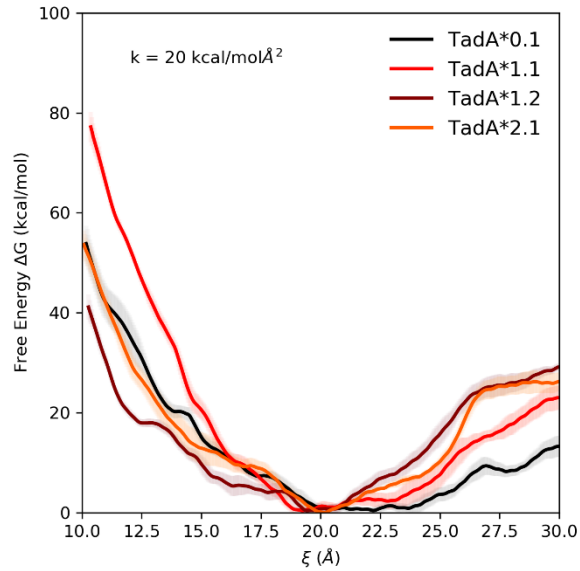

**Fig. S5. Mutations lead to an increase in TadA\* binding to the ssDNA (AAG).** The free energy profile of binding of the ssDNA (5'-GTCAAGAAAC-3') to various TadA\*s. For each TadA\*-ssDNA complex, the average PMF is shown as a function of the continuously changing  $\xi$  values. The shaded regions around the individual curves depict the standard deviation for 4 independent replicates of the umbrella sampling simulations.

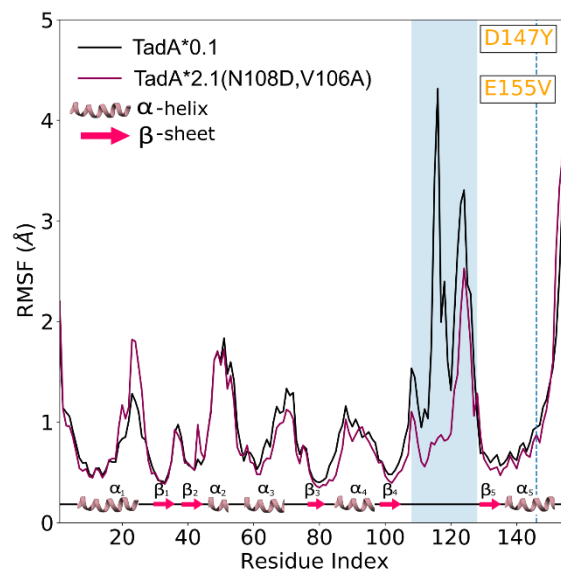

**Fig. S6. Structural importance of Ala<sup>106</sup>Val mutation.** Residue level flexibility of TadA\* shown in terms of the root-mean-squared-fluctuations (RMSFs) of the C<sub>α</sub> atoms of the peptide backbone of TadA\*2.1(N108D, V106A). The <sub>4</sub>-beta5 loop region is highlighted. This plot, along with the RMSF analysis of TadA\*1.2(N108D) and TadA\*2.1(N108D) variants (Fig. 6B in the main text)) shows that Ala106Val mutation imparts structural stability to the β<sub>4</sub>-β<sub>5</sub> loop of the TadA\*, in a manner analogous to the Asp108Asn mutation.

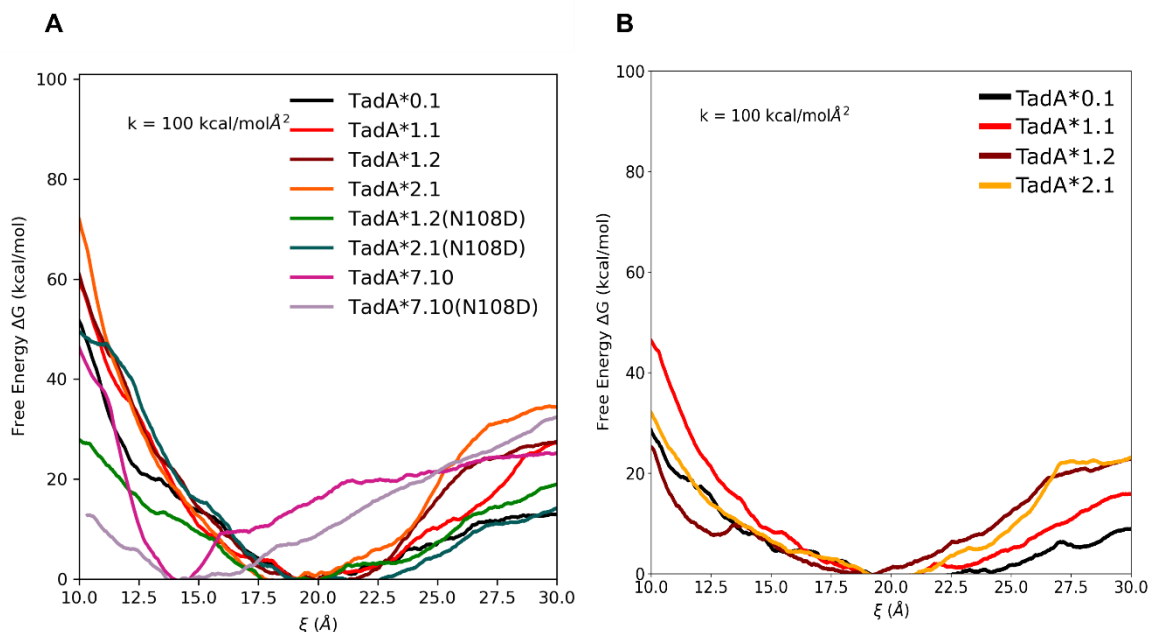

**Fig. S7. PMF of the Tada\*-ssDNA complexes calculated using steered MD simulations.** The configurations extracted from the SMD trajectory were used to initiate umbrella simulations for (A) Tada\*-ssDNA (TAC) and (B) Tada\*-ssDNA (AAG). The incorporation of 14 mutations in the Tada\* structure leads to a shift in the equilibrium position of the ssDNA towards the active site of the Tada\*. The reversal of Asn108 to Asp for the initial mutants is accompanied by decrease in the binding affinity for the initial mutants, TadA\*1.2 and TadA\*2.1. For the highly mutated TadA\*7.10, the Asn108Asp reversal mutation leads to a flattening of the free energy profile, which indicates that the ssDNA can easily traverse out of the active site and hence the TadA\*7.10(N108D) lacks ssDNA editing efficiency.

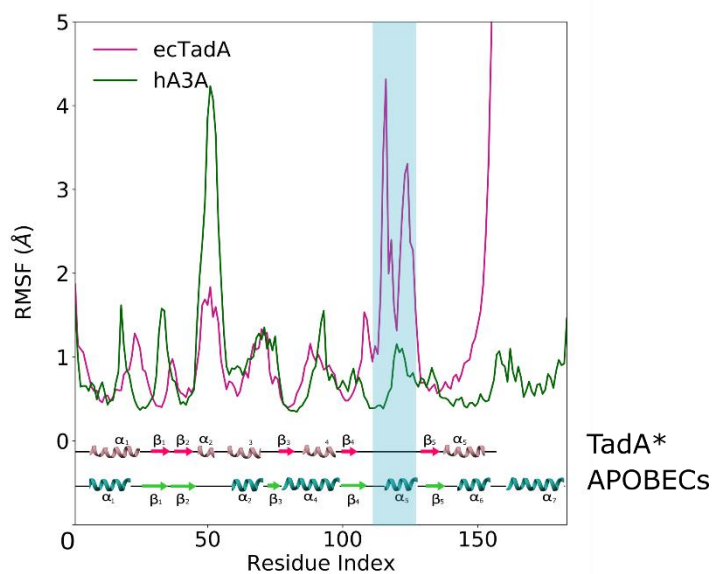

**Fig. S8. Comparison of the structural flexibility of the ecTadA with hAPOBEC3A.** Shown are the root mean squared fluctuations (RMSFs) as a function of the residues of each of the proteins.

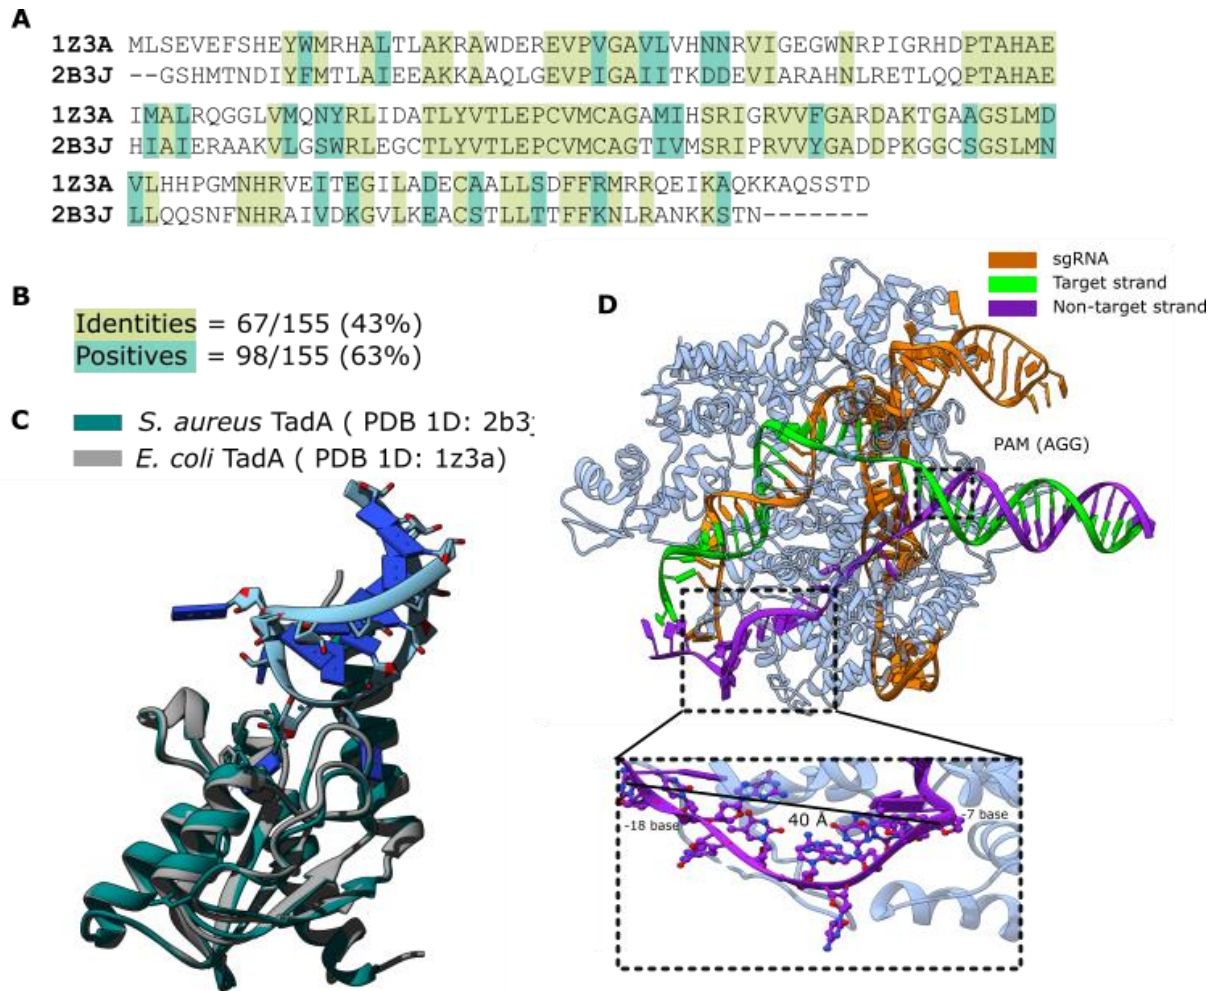

**Fig. S9. Modeling of TadA\*-ssDNA.** (A) Sequence alignment of *E. coli* TadA with *S. aureus* TadA. The aligned sequences are highlighted to depict identical and similar residues between the two sequences. (b) Percentage identity and similarity scores of the TadA sequences, calculated using Blastp. (C) Structural alignment of *S. aureus* TadA-RNA and *E. coli* TadA. (D) Structure of *S. pyogenes* Cas9 in complex with the sgRNA and the target DNA. The 11 nucleotides of the distal end of the non-target strand are highlighted as the purple sticks in the figure inset, bases -7 to -18 from the PAM site were used as reference to model the RNA from fig. S7 (C) into the exposed ssDNA.

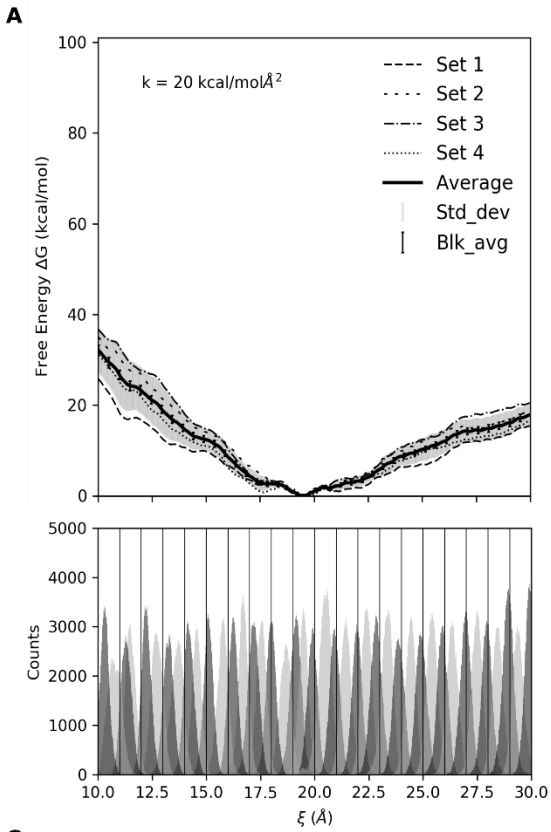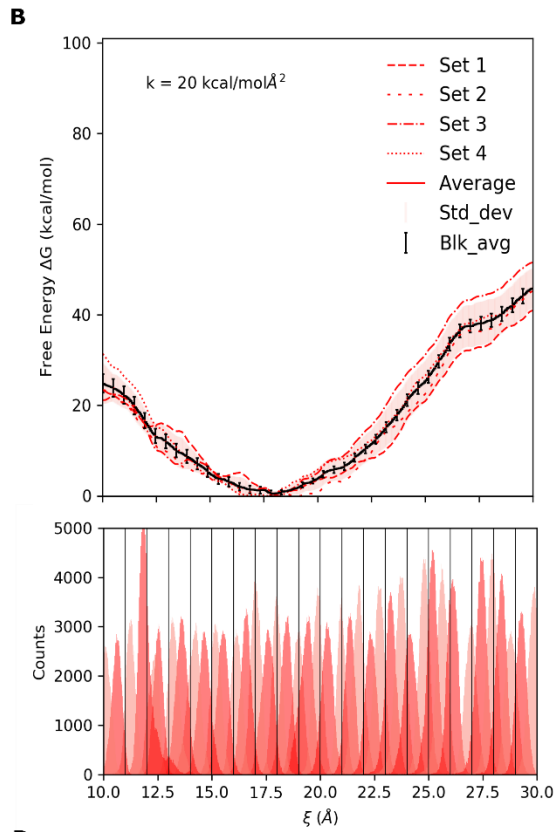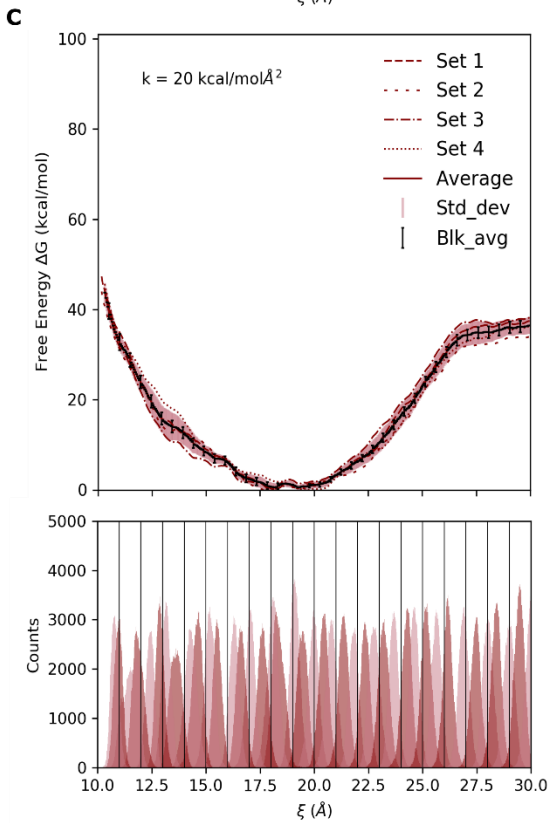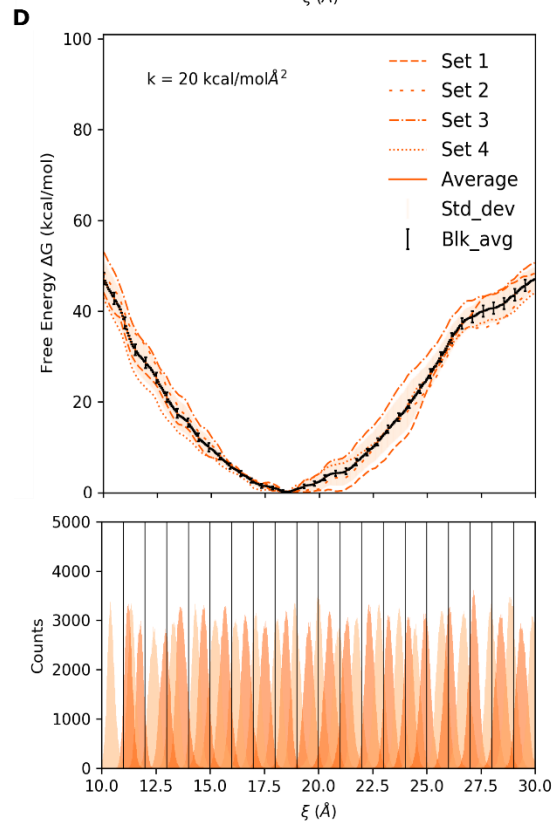

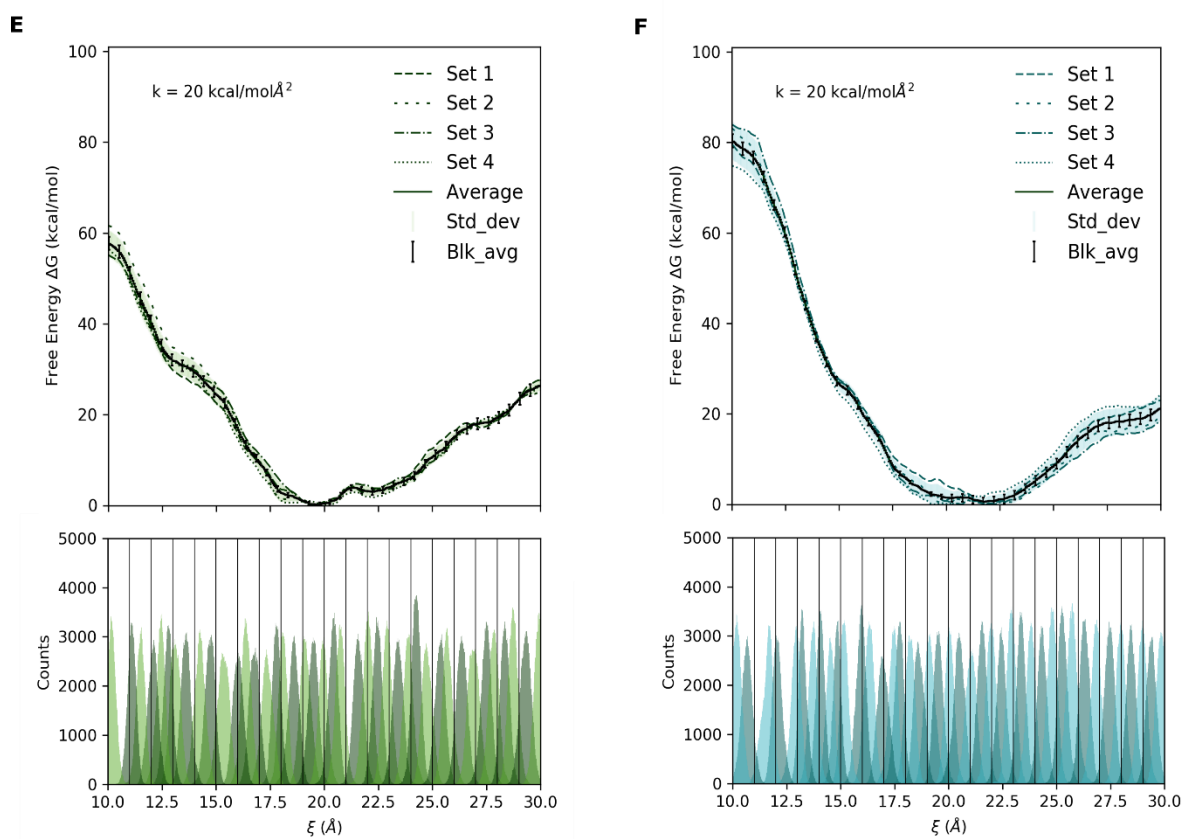

**Fig. S10. Umbrella sampling data and biased statistics.** Individual PMFs associated to 4 independently conducted umbrella sampling simulations and the biased probability distributions (histograms) obtained from individual windows that stratify the  $\xi$  space, for TadA\*0.1-ssDNA (A), TadA\*1.1-ssDNA (B), TadA\*1.2-ssDNA (C), TadA\*2.1-ssDNA (D), TadA\*1.2(N108D)-ssDNA (E), and TadA\*2.1(N108D)-ssDNA (F) complex. In each PMF profile the shaded region indicated the standard deviation of the individual PMFs and the error bars are the error calculated using block averaging method for individual windows.

## Supplementary Tables

**Table S1. Comparison of RMSD of the representative clusters.** The alignment of all the clusters is done with respect to the Cluster 1, using the C $\alpha$  distance of the residues composing the  $\beta$ 4- $\beta$ 5 loop.

| Cluster Number | RMSD TadA*0.1 | RMSD TadA*1.1 | RMSD TadA*1.2 | RMSD TadA*2.1 |
|----------------|---------------|---------------|---------------|---------------|
| 1              | 0.000         | 0.000         | 0.000         | 0.000         |
| 2              | 3.017         | 0.725         | 0.437         | 0.559         |
| 3              | 0.348         | 0.796         | 0.445         | 0.693         |
| 4              | 1.333         | 1.484         | 0.824         | 0.861         |
| 5              | 0.435         | 0.777         | 1.293         | 0.670         |
| 6              | 2.626         | 0.571         | 1.141         | 0.660         |
| 7              | 3.216         | 0.798         | 1.101         | 0.585         |
| 8              | 0.864         | 0.781         | 1.130         | 0.891         |
| 9              | 2.377         | 0.578         | 1.434         | 0.916         |
| 10             | 3.331         | 0.930         | 1.083         | 0.405         |
| Average        | 1.754         | 0.744         | 0.888         | 0.624         |



**Table S2. Summary of the systems modeled and the types of simulations conducted in this study.**

| System                     | Number of Atoms | Simulation Type | Simulation Length(ns) |                   |                               |
|----------------------------|-----------------|-----------------|-----------------------|-------------------|-------------------------------|
| wtTadA-RNA                 | 33906           | Steered MD      | 100                   |                   |                               |
| TadA*0.1                   | 35727           | Unbiased MD     | 500                   |                   |                               |
| TadA*1.1                   | 35729           |                 |                       |                   |                               |
| TadA*1.2                   | 35741           |                 |                       |                   |                               |
| TadA*2.1                   | 35751           |                 |                       |                   |                               |
| TadA*7.10                  | 35648           |                 |                       |                   |                               |
| TadA*1.2(N108D)            | 35537           |                 |                       |                   |                               |
| TadA*2.1(N108D)            | 35752           |                 |                       |                   |                               |
| TadA**2.1(N108D,V106A)     | 35728           |                 |                       |                   |                               |
| APOBEC                     | 79144           |                 |                       |                   |                               |
| TadA*0.1-ssDNA(TAC)        | 36125           | Unbiased MD     | 500                   |                   |                               |
| TadA*1.1-ssDNA(TAC)        | 36504           |                 |                       |                   |                               |
| TadA*1.2-ssDNA(TAC)        | 36507           |                 |                       |                   |                               |
| TadA*2.1-ssDNA(TAC)        | 36557           |                 |                       |                   |                               |
| TadA*0.1-ssDNA(TAC)        | 36125           | Steered MD      | 200                   |                   |                               |
| TadA*1.1-ssDNA(TAC)        | 36504           |                 |                       |                   |                               |
| TadA*1.2-ssDNA(TAC)        | 36507           |                 |                       |                   |                               |
| TadA*2.1-ssDNA(TAC)        | 36557           |                 |                       |                   |                               |
| TadA*7.10-ssDNA(TAC)       | 35257           |                 |                       |                   |                               |
| TadA*1.2(N108D)-ssDNA(TAC) | 36510           |                 |                       |                   |                               |
| TadA*2.1(N108D)-ssDNA(TAC) | 36554           |                 |                       |                   |                               |
| TadA*0.1-ssDNA(AAG)        | 30287           |                 |                       |                   |                               |
| TadA*1.1-ssDNA(AAG)        | 28764           |                 |                       |                   |                               |
| TadA*1.2-ssDNA(AAG)        | 28764           |                 |                       |                   |                               |
| TadA*2.1-ssDNA(AAG)        | 28733           |                 |                       |                   |                               |
| TadA*0.1-ssDNA(TAC)        | 36125           |                 |                       | Umbrella Sampling | 41 windows ×<br>4 sets × 20ns |
| TadA*1.1-ssDNA(TAC)        | 36504           |                 |                       |                   |                               |
| TadA*1.2-ssDNA(TAC)        | 36507           |                 |                       |                   |                               |
| TadA*2.1-ssDNA(TAC)        | 36557           |                 |                       |                   |                               |
| TadA*1.2(N108D)-ssDNA(TAC) | 36510           |                 |                       |                   |                               |
| TadA*2.1(N108D)-ssDNA(TAC) | 36554           |                 |                       |                   |                               |
| TadA*0.1-ssDNA(AAG)        | 30287           |                 |                       |                   |                               |
| TadA*1.1-ssDNA(AAG)        | 28764           |                 |                       |                   |                               |
| TadA*1.2-ssDNA(AAG)        | 28764           |                 |                       |                   |                               |
| TadA*2.1-ssDNA(AAG)        | 28733           |                 |                       |                   |                               |

**Table S3. DNA sequences used for simulations and in mammalian tissue culture experiments.** The sequence context (target motif) of the edited A is shown for each site. PAM sequences are shown in blue

| Target Motif | Protospacer and PAM Sequence                      |
|--------------|---------------------------------------------------|
| TAC          | GACTACAGACT (Sequence used in simulations)        |
| AAG          | GTCAAGAAAC (Sequence used in simulations)         |
| CAC          | GAACA <sub>5</sub> CAAAGCATAGACTGC <sub>GGG</sub> |
| TAT          | GAGTA <sub>5</sub> TGAGGCATAGACTGC <sub>AGG</sub> |
| CAA          | GAGCA <sub>5</sub> AAGAGAATAGACTGT <sub>AGG</sub> |
| AAA          | GAGCA <sub>6</sub> AGAGAATAGACTGT <sub>AGG</sub>  |
| GAC          | GGATTGA <sub>7</sub> CCCAGGCCAGGGCT <sub>GG</sub> |
| CAC          | CAGAGA <sub>7</sub> CTGGAATTCGTCAG <sub>GG</sub>  |

**Table S4. First round genomic DNA PCR sequences.**

| Primer Name     | Primer Sequence                                                         |
|-----------------|-------------------------------------------------------------------------|
| CAC (pos 5)-Fwd | ACACTCTTCCCTACACGACGCTCTTCCGATCTN <sub>NNN</sub> ATTGTCCAGCCCCATCTGTCAA |
| CAC (pos 5)-Rev | TGGAGTTCAGACGTGTGCTCTTCCGATCTTCAAGTACTGCAGCCCAAGC                       |
| TAT-Fwd         | ACACTCTTCCCTACACGACGCTCTTCCGATCTN <sub>NNN</sub> NAGAGACTGATTGCGTGGAGT  |
| TAT-Rev         | TGGAGTTCAGACGTGTGCTCTTCCGATCTCACTCCAGCCTAGGCAACAA                       |
| CAA/AAA-Fwd     | ACACTCTTCCCTACACGACGCTCTTCCGATCTN <sub>NNN</sub> CTGCACCTAGCCTCCATGTC   |
| CAA/AAA-Rev     | TGGAGTTCAGACGTGTGCTCTTCCGATCTCCTTGCACTGAGACCGTGAA                       |
| GAC-Fwd         | ACACTCTTCCCTACACGACGCTCTTCCGATCTN <sub>NNN</sub> ATGTGGGCTGCCTAGAAAGG   |
| GAC-Rev         | TGGAGTTCAGACGTGTGCTCTTCCGATCTCCAGCCAAACTTGTCAACC                        |
| CAC (pos 7)-Fwd | ACACTCTTCCCTACACGACGCTCTTCCGATCTN <sub>NNN</sub> NGCCCTGCTTCTTTTCTCTGGT |
| CAC (pos 7)-Rev | TGGAGTTCAGACGTGTGCTCTTCCGATCTACCATTAACGCAGCCAACTTCA                     |

## Supplementary sequences

red: TadA; purple: mutations of interest; blue: Cas9; green: EGFP

### ABE0.1

MKRTADGSEFESPKKKRKVSEVEFSHEYWMRHALTLAKRAWDEREVPVGAVLVHNNRVIGEG  
WNRPIGRHDPTAHAEIMALRQGGGLVMQNYRLIDATLYVTLEPCVMCAGAMIHSRIGRVVFGA  
RDAKTGAAGSLMDVLHHPGMNHRVEITEGILADECAALLSDFFRMRRQEIKAQKKAQSSTDS  
GGSSGGSSGSETPGTSESATPESGGSSGGSDKKYSIGLAIGTNSVGVAVITDEYKVPSSKFF  
KVLGNTDRHSIKKNLIGALLFDSGETAEATRLKRTARRRYTRRKNRICYLQEIFSNEMAKVD  
DSFFHRLEESFLVEEDKKHERHPIFGNIVDEVAYHEKYPTIYHLRKKLVDSTDKADLRLIYL  
ALAHMIKFRGHFLIEGDLNPDNSDVKLFIQLVQTYNQLFEEENPINASGVDAKAILSARLSK  
SRLENLIAQLPGEKKNGLFGNLIASLGLTPNFKSNFDLAEDAKLQLSKDTYDDDLNLLA  
QIGDQYADLFLAAKNLSDAILLSDI LRVNTEITKAPLSASMIKRYDEHHQDLTLLKALVRQQ  
LPEKYKEIFFDQSKNGYAGYIDGGASQEEFYKFIKPILEKMDGTEELLVKLNREDLLRKQRT  
FDNGSIPHQIHLGELHAILRRQEDFY PFLKDNREKIEKILTFRI PYYVGPLARGNSRFAMWT  
RKSEETITPWNFEVVDKGASAQSFIERMTNFDKNLPNEKVLPKHSLLYEYFTVYNELTKVK  
YVTEGMRKPAFLSGEQKKAIVDLLFKTNRKVTVKQLKEDYFKKIECFDSVEISGVEDRFNAS  
LGTYHDLKI IKDKDFLDNEENEDI LEDIVLTLTLFEDREMI EERLKYAHLFDDKVMKQLK  
RRRYTGWGRLSRKLINGIRDKQSGKTILDFLKSDFANRNFMQLIHDDSLTFKEDIQKAQVS  
GQGDSLHEHIANLAGSPA IKKGILQTVKVVDELVKVMGRHKPENIVIEMARENQTTQKGQKN  
SRERMKRIEEGIKELGSQILKEHPVENTQLQNEKLYLYLQNGRDMYVDQELDINRLSDYDV  
DHIVPQSFLKDDSIDNKVLTRSDKNRGKSDNVPSEEVVKKMKNYWRQLLNAKLITQRKFDNL  
TKAERGGLSELDKAGFIKRQLVETRQITKHVAQILD SRMNTKYDENDKLIREVKVITLKS KL  
VSDFRKDFQFYKVREINNYHHAHDAYLNAVVG TALIKKYPKLESEFVYGDYKVYDVRKMIAK  
SEQEIGKATAKYFFYSNIMNFFKTEITLANGEIRKRPLIETNGETGEIVWDKGRDFATVRKV  
LSMPQVNIVKKTEVQTTGGFSKESILPKRNSDKLIARKKDWDPKKYGGFDSPTVAYSVLVAK  
VEKGKSKKLKSVKELLGITIMERSSEKNPIDFLEAKGYKEVKKDLI IKLPKYSLFELENGR  
KRMLASAGELQKGNELALPSKYVNFLYLASHYEKLGKSPEDNEQKQLFVEQHKHYLDEIEEQ  
ISEFSKRVI LADANLDKVL SAYNKH RDKPIREQAENI IHLFTLTNLGAPAAF KYFDTTIDRK  
RYTSTKEVLDATLIHQSI TGLYETRIDLSQLGGDSGGSKRTADGSEFEPKKKRKVGSGATNF  
SLLKQAGDVEENPGPMVSKGEELEFTGVVPI LVELDGDVNGHKFSVSGEGEGDATY GKLTLKF  
ICTTGKLPVPWPTLVTTLTLYGVQCFSRYPDHMKQHDFFKSAMPEGYVQERTIFFKDDGNYKT  
RAEVKFEGDTLVNRIELKGI DFKEDGNILGHKLEYNYN SHNVYIMADKQKNGIKVNFKIRHN  
IEDGSVQLADHYQQNTPIGDGPVLLPDNHYLSTQSALS KDPNEKRDH MVLLEFVTAAGITLG  
MDELYKSGGSPKKKRKV

## ABE1.1

MKRTADGSEFESP KKKRKVSEVEFSHEYWMRHALTLAKRAWDEREVPVGAVLVHNNRVIGEG  
WNRPIGRHDPTAHAEIMALRQGGGLVMQNYRLIDATLYVTLEPCVMCAGAMIHSRIGRVVFGA  
RNAKTGAAGSLMDVLHHPGMNHRVEITEGILADECAALLSDFFRMRRQEIKAQKKAQSSTDS  
GGSSGGSSGSETPGTSESATPESGGSSGGSDKKYSIGLAIGTNSVGVAVITDEYKVP SKKF  
KVLGNTDRHSIKKNLIGALLFDSGETAEATRLKRTARRRYTRRKNRICYLQEIFS NEMAKVD  
DSFFHRLEESFLVEEDKKHERHPIFGNIVDEVAYHEKYPTIYHLRKKLVDSTDKADLRIYL  
ALAHMIKFRGHFLIEGDLNPDNSDVKLFIQLVQTYNQLFEENPINASGVDAKAILSARLSK  
SRLENLIAQLPGEKKNLFGNLIASLGLTPNFKSNFDLAEDAKLQLSKD TYDDDLNLLA  
QIGDQYADLFLAAKNLSDAILLSDILRVNTEITKAPLSASMIKRYDEHHQDLTLLKALVRQQ  
LPEKYKEIFFDQSKNGYAGYIDGGASQEEFYKFIKPILEKMDGTEELLVKLNREDLLRKQRT  
FDNGSIPHQIHLGELHAILRRQEDFPFLKDNREKIEKILTFRIPIYVGPLARGNSRFAWMT  
RKSEETITPWNFEEVVDKGASAQSFIERMTNFDKNLPNEKVLPKHSLLEYEFTVYNELTKVK  
YVTEGMRKPAFLSGEQKKAIVDLLFKTNRKVTVKQLKEDYFKKIECFDSVEISGVEDRFNAS  
LGT YHDLKI IKDKDFLDNEENEDILEDIVLTLTLFEDREMIEERLKYAHLFDDKVMKQLK  
RRRYTGWGRLSRKLINGIRDKQSGKTILDFLKSDFANRNFMLIHDDSLTFKEDIQKAQVS  
GQGDSLHEHIANLAGSPA IKKGI LQTVKVVDELVKVMGRHKPENIVIEMARENQTTQKGQKN  
SRERMKRIEEGIKELGSQILKEHPVENTQLQNEKLYLYLQNGRDMYVDQELDINRLSDYDV  
DHIVPQSFLKDDSIDNKVLRSDKNRGKSDNVPSEEVVKKMKNYWRQLLNAKLITQRKFDNL  
TKAERGGELSELDKAGFIKRQLVETRQITKHVAQILD SRMNTKYDENDKLIREVKVITLKS KL  
VSDFRKDFQFYK VREINNYHHAHDAYLNAVVG TALIKKYPKLESEFVYGDYKVYDVRKMIAK  
SEQEIGKATAKYFFYSNIMNFFKTEITLANGEIRKRPLIETNGETGEIVWDKGRDFATVRKV  
LSMPQVNIVKKTEVQTGGFSKESILPKRNSDKLIARKKDWDPKKYGGFDSPTVAYSVLVVAK  
VEKGKSKKLKSVKELLGITIMERS SFEKNPIDFLEAKGYKEVKKDLI IKLPKYSLFELENGR  
KRMLASAGELQKGNELALPSKYVNFLYLASHYEKLGKSPEDNEQKQLFVEQHKKHYLDEIEEQ  
ISEFSKR VILADANLDKVL SAYNKHRDKPIREQAENI IHLFTLTNLGAPAAF KYFDTTIDRK  
RYTSTKEVLDATLIHQSI TGLYETRIDLSQLGGDSGGSKRTADGSEFEP KKKRKV GSGATNF  
SLLKQAGDVEENPGPMVSKGEELFTGVVPI LVELDGDVNGHKFSVSGEGEGDATY GKLTLKF  
ICTTGKLPVPWPPTLVTTLTLYGVQCFSRYPDHMKQHDFFKSAMP EGYVQERTIFFKDDGNYKT  
RAEVKFE GDTLVNRIELKGI DFKEDGNILGHKLEYNYNSHN VYIMADKQKNGIKVNFKIRHN  
IEDGSVQLADHYQQNTPIGDGPVLLPDNHYLSTQSALS KDPNEKRDH MVLLEFVTAAGITLG  
MDELYKSGGSP KKKRKV

## ABE1.2

MKRTADGSEFESP KKKRKVSEVEFSHEYWMRHALTLAKRAWDEREVPVGAVLVHNNRVIGEG  
WNRPIGRHDPTAHAEIMALRQGGGLVMQNYRLIDATLYVTLEPCVMCAGAMIHSRIGRVVFGV  
RNAKTGAAGSLMDVLHHPGMNHRVEITEGILADECAALLSDFFRMRRQEIKAQKKAQSSTDS  
GGSSGGSSGSETPGTSESATPESGGSSGGSDKKYSIGLAIGTNSVGVAVITDEYKVP SKKF  
KVLGNTDRHSIKKNLIGALLFDSGETAEATRLKRTARRRYTRRKNRICYLQEIFS NEMAKVD  
DSFFHRLEESFLVEEDKKHERHPIFGNIVDEVAYHEKYPTIYHLRKKLVDSTDKADLRLIYL  
ALAHMIKFRGHFLIEGDLNPDNSDVKLFIQLVQTYNQLFEE NPINASGVDAKAILSARLSK  
SRLENLIAQLPGEKKNLFGNLIALSLGLTPNFKSNFDLAEDAKLQLSKDTYDDDLNLLA  
QIGDQYADLFLAAKNLSDAILLSDILRVNTEITKAPLSASMIKRYDEHHQDLTLLKALVRQQ  
LPEKYKEIFFDQSKNGYAGYIDGGASQEEFYKFIKPILEKMDGTEELLVKLNREDLLRKQRT  
FDNGSIPHQIHLGELHAILRRQEDFY PFLKDNREKIEKILTFRI PYYVGPLARGNSRFAWMT  
RKSEETITPWNFEVVDKGASAQSFIERMTNFDKNLPNEKVLPKHSLLYEYFTVYNELTKVK  
YVTEGMRKPAFLSGEQKKAIVDLLFKTNRKVTVKQLKEDYFKKIECFDSVEISGVEDRFNAS  
LGTYHDLLKI IKDKDFLDNEENEDILEDIVLTLTLFEDREMIEERLKYAHLFDDKVMKQLK  
RRRYTGWGRLSRKLINGIRDKQSGKTILDFLKS DGFANRNFMQLIHDDSLTFKEDIQKAQVS  
GQGDSLHEHIANLAGSPA IKKGILQTVKVVDELVKVMGRHKPENIVIEMARENQTTQKGQKN  
SRERMKRIEEGIKELGSQILKEHPVENTQLQNEKLYLYLQNGRDMYVDQELDINRLSDYDV  
DHIVPQSFLKDDSIDNKVLTRSDKNRGKSDNVPSEEVVKKMKNYWRQLLNAKLITQRKFDNL  
TKAERGGELSELDKAGFIKRQLVETRQITKHVAQILDSRMNTKYDENDKLIREVKVITLKS KL  
VSDFRKDFQFYKVREINNYHHAHDAYLNAVVG TALIKKYPKLESEFVYGDYKVYDVRKMIAK  
SEQEIGKATAKYFFYSNIMNFFKTEITLANGEIRKRPLIETNGETGEIVWDKGRDFATVRKV  
LSMPQVNIVKKTEVQTGGFSKESILPKRNSDKLIARKKDWDPKKYGGFDSPTVAYSVLVVAK  
VEKGKSKKLKSVKELLGITIMERS SFEKNPIDFLEAKGYKEVKKDLI IKLPKYSLFELENGR  
KRMLASAGELQKGNELALPSKYVNFLYLASHYEKLGKSPEDNEQKQLFVEQHKHYLDEIIEQ  
ISEFSKRVILADANLDKVL SAYNKHRDKPIREQAENI IHLFTLTNLGAPAAF KYFDTTIDRK  
RYTSTKEVLDATLIHQSI TGLYETRIDLSQLGGSSGSKRTADGSEFEP KKKRKV GSGATNF  
SLLKQAGDVEENPGPMVSKGEELFTGVVPI LVELDGDVNGHKFSVSGEGEGDATY GKLTLKF  
ICTTGKLPVPWPTLVTTLTLYGVQCFSRYPDHMKQHDFFKSAMPEGYVQERTIFFKDDGNYKT  
RAEVKFEGDTLVNRIELKGI DFKEDGNILGHKLEYNYNSHNVIYIMADKQKNGIKVNFKIRHN  
IEDGSVQLADHYQQNTPIGDGPVLLPDNHYLSTQSALS KDPNEKRDHMLLEFVTAAGITLG  
MDELYKSGGSP KKKRKV

**ABE1.2(N108D)**

MKRTADGSEFESPKKKRKVSEVEFSHEYWMRHALTLAKRAWDEREVPVGAVLVHNNRVIGEG  
WNRPIGRHDPTAHAEIMALRQGGGLVMQNYRLIDATLYVTLEPCVMCAGAMIHSRIGRVVFGV  
RDAKTGAAGSLMDVLHHPGMNHRVEITEGILADECAALLSDFFRMRRQEIKAQKKAQSSTDS  
GGSSGGSSGSETPGTSESATPESGGSSGGSDKKYSIGLAIGTNSVGVAVITDEYKVPSSKKF  
KVLGNTDRHSIKKNLIGALLFDSGETAEATRLKRTARRRYTRRKNRICYLQEIFSNEMAKVD  
DSFFHRLEESFLVEEDKKHERHPIFGNIVDEVAYHEKYPTIYHLRKKLVDSTDKADLRLIYL  
ALAHMIKFRGHFLIEGDLNPDNSDVKLFIQLVQTYNQLFEENPINASGVDAKAILSARLSK  
SRLENLIAQLPGEKKNGLFGNLIASLGLTPNFKSNFDLAEDAKLQLSKD TYDDDLDNLLA  
QIGDQYADLFLAAKNLSDAILLSDILRVNTEITKAPLSASMIKRYDEHHQDLTLLKALVRQQ  
LPEKYKEIFFDQSKNGYAGYIDGGASQEEFYKFIKPILEKMDGTEELLVKLNREDLLRKQRT  
FDNGSIPHQIHLGELHAILRRQEDFPFLKDNREKIEKILTFRIPIYVGPLARGNSRFAWMT  
RKSEETITPWNFEEVVDKGASAQSFIERMTNFDKNLPNEKVLPKHSLLEYFTVYNELTKVK  
YVTEGMRKPAFLSGEQKKAIVDLLFKTNRKVTVKQLKEDYFKKIECFDSVEISGVEDRFNAS  
LGTYHDLLKIIKDKDFLDNEENEDILEDIVLTLTLFEDREMIERLKYAHLFDDKVMKQLK  
RRRYTGWGRLSRKLINGIRDKQSGKTILDFLKSDFANRNFMQLIHDDSLTFKEDIQKAQVS  
GQGDSLHEHIANLAGSPAIKKGILOTVKVVDELVKVMGRHKPENIVIEMARENQTTQKGQKN  
SRERMKRIEEGIKELGSQILKEHPVENTQLQNEKLYLYLQNGRDMYVDQELDINRLSDYDV  
DHIVPQSFLKDDSIDNKVLTRSDKNRGKSDNVPSEEVVKKMKNYWRQLLNAKLITQRKFDNL  
TKAERGGELSELDKAGFIKRQLVETRQITKHVAQILD SRMNTKYDENDKLIREVKVITLTKSKL  
VSDFRKDFQFYKVREINNYHHAHADAYLNAVVG TALIKKYPKLESEFVYGDYKVYDVRKMIAK  
SEQEIGKATAKYFFYSNIMNFFKTEITLANGEIRKRPLIETNGETGEIVWDKGRDFATVRKV  
LSMPQVNIVKKTEVQTGGFSKESILPKRNSDKLIARKKDWDPKKYGGFDSPTVAYSVLVVAK  
VEKGKSKKLKSVKELLGITIMERSSEKNPIDFLEAKGYKEVKKDLIIKLPKYSLFELENGR  
KRMLASAGELQKGNELALPSKYVNFLYLASHYEKLGKSPEDNEQKQLFVEQHKHYLDEIEEQ  
ISEFSKRVI LADANLDKVL SAYNKH RDKPIREQAENI IHLFTLTNLGAPAAF KYFDTTIDRK  
RYTSTKEVLDATLIHQSI TGLYETRIDLSQLGGDSGGSKRTADGSEFEPKKKRKVGSGATNF  
SLLKQAGDVEENPGPMVSKGEELFTGVVPI LVELDGDVNGHKFSVSGEGEGDATY GKLTLKF  
ICTTGKLPVPWPTLVTTLTLYGVQCFSRYPDHMKQHDFFKSAMPEGYVQERTIFFKDDGNYKT  
RAEVKFEGDTLVNRIELKGI DFKEDGNILGHKLEYNYNSHNVYIMADKQKNGIKVNFKIRHN  
IEDGSVQLADHYQQNTPIGDGPVLLPDNHYLSTQSALS KDPNEKRDMVLLLEFVTAAGITLG  
MDELYKSGGSPKKKRKV

## ABE2.1

MKRTADGSEFESPKKKRKVSEVEFSHEYWMRHALTLAKRAWDEREVPVGAVLVHNNRVIGEG  
WNRPIGRHDPTAHAEIMALRQGGGLVMQNYRLIDATLYVTLEPCVMCAGAMIHSRIGRVVFGV  
RNAKTGAAGSLMDVLHHPGMNHRVEITEGILADECAALLSYFFRMRRQVIKAQKKAQSSTDS  
GGSSGGSSGSETPGTSESATPESGGSSGGSDKKYSIGLAIGTNSVGVAVITDEYKVPKSKF  
KVLGNTDRHSIKKNLIGALLFDSGETAEATRLKRTARRRYTRRKNRICYLQEIFSNEMAKVD  
DSFFHRLEESFLVEEDKKHERHPIFGNIVDEVAYHEKYPTIYHLRKKLVDSTDKADLRLIYL  
ALAHMIKFRGHFLIEGDLNPDNSDVKLFIQLVQTYNQLFEENPINASGVDAKAILSARLSK  
SRLENLIAQLPGEKKNGLFGNLIASLGLTPNFKSNFDLAEDAKLQLSKD TYDDDLNLLA  
QIGDQYADLFLAAKNLSDAILLSDILRVNTEITKAPLSASMIKRYDEHHQDLTLLKALVRQQ  
LPEKYKEIFFDQSKNGYAGYIDGGASQEEFYKFIKPILEKMDGTEELLVKLNREDLLRKQRT  
FDNGSIPHQIHLGELHAILRRQEDFY PFLKDNREKIEKILTFRI PYYVGPLARGNSRFAWMT  
RKSEETITPWNFEEVVDKGASAQSFIERMTNFDKNLPNEKVLPKHSLLEYFTVYNELTKVK  
YVTEGMRKPAFLSGEQKKAIVDLLFKTNRKVTVKQLKEDYFKKIECFDSVEISGVEDRFNAS  
LGTYHDLLKIIKDKDFLDNEENEDILEDIVLTLTLFEDREMIEERLKYAHLFDDKVMKQLK  
RRRYTGWGRLSRKLINGIRDKQSGKTILDFLKSDFANRNFMQLIHDDSLTFKEDIQKAQVS  
GQGDSLHEHIANLAGSPAIKKGILOTVKVVDELVKVMGRHKPENIVIEMARENQTTQKGQKN  
SRERMKRIEEGIKELGSQILKEHPVENTQLQNEKLYLYLQNGRDMYVDQELDINRLSDYDV  
DHIVPQSFLKDDSIDNKVLTRSDKNRGKSDNVPSEEVVKKMKNYWRQLLNAKLITQRKFDNL  
TKAERGGELSELDKAGFIKRQLVETRQITKHVAQILD SRMNTKYDENDKLIREVKVITLKS KL  
VSDFRKDFQFYKVREINNYHHAHADAYLNAVVG TALIKKYPKLESEFVYGDYKVYDVRKMIAK  
SEQEIGKATAKYFFYSNIMNFFKTEITLANGEIRKRPLIETNGETGEIVWDKGRDFATVRKV  
LSMPQVNIVKKTEVQTGGFSKESILPKRNSDKLIARKKDWDPKKYGGFDSPTVAYSVLVVAK  
VEKGKSKKLKSVKELLGITIMERSSEKNPIDFLEAKGYKEVKKDLI IKLPKYSLFELENGR  
KRMLASAGELQKGNELALPSKYVNFLYLASHYEKLGKSPEDNEQKQLFVEQHKHYLDEIEEQ  
ISEFSKRVILADANLDKVL SAYNKH RDKPIREQAENI IHLFTLTNLGAPAAF KYFDTTIDRK  
RYTSTKEVLDATLIHQSI TGLYETRIDLSQLGGDSGGSKRTADGSEFEPKKKRKVGSGATNF  
SLLKQAGDVEENPGPMVSKGEELFTGVVPI LVELDGDVNGHKFSVSGEGEGDATY GKLTLKF  
ICTTGKLPVPWPPTLVTTLTLYGVQCFSRYPDHMKQHDFFKSAMPEGYVQERTIFFKDDGNYKT  
RAEVKFEGDTLVNRIELKGI DFKEDGNILGHKLEYNYNSHNVYIMADKQKNGIKVNFKIRHN  
IEDGSVQLADHYQQNTPIGDGPVLLPDNHYLSTQSALS KDPNEKRDMVLLLEFVTAAGITLG  
MDELYKSGGSPKKKRKV

**ABE2.1(N108D)**

MKRTADGSEFESP KKKRKVSEVEFSHEYWMRHALTLAKRAWDEREVPVGAVLVHNNRVIGEG  
WNRPIGRHDPTAHAEIMALRQGGLVMQNYRLIDATLYVTLEPCVMCAGAMIHSRIGRVVFGV  
RDAKTGAAGSLMDVLHHPGMNHRVEITEGILADECAALLSYFFRMRRQVIKAQKKAQSSTDS  
GGSSGGSSGSETPGTSESATPESGGSSGGSDKKYSIGLAIGTNSVGVAVITDEYKVP SKKF  
KVLGNTDRHSIKKNLIGALLFDSGETAEATRLKRTARRRYTRRKNRICYLQEIFS NEMAKVD  
DSFFHRLEESFLVEEDKKHERHPIFGNIVDEVAYHEKYPTIYHLRKKLVDSTDKADLRLIYL  
ALAHMIKFRGHFLIEGDLNPDNSDVKLFIQLVQTYNQLFEENPINASGVDAKAILSARLSK  
SRLENLIAQLPGEKKNGLFGNLIASLGLTPNFKSNFDLAEDAKLQLSKD TYDDDLNLLA  
QIGDQYADLFLAAKNLSDAILLSDILRVNTEITKAPLSASMIKRYDEHHQDLTLLKALVRQQ  
LPEKYKEIFFDQSKNGYAGYIDGGASQEEFYKFIKPILEKMDGTEELLVKLNREDLLRKQRT  
FDNGSIPHQIHLGELHAILRRQEDFPFLKDNREKIEKILTFRIPIYVGPLARGNSRFAWMT  
RKSEETITPWNFEEVVDKGASAQSFIERMTNFDKNLPNEKVLPKHSLLEYEFTVYNELTKVK  
YVTEGMRKPAFLSGEQKKAIVDLLFKTNRKVTVKQLKEDYFKKIECFDSVEISGVEDRFNAS  
LGTYHDLLKIIKDKDFLDNEENEDILEDIVLTLTLFEDREMIEERLKYAHLFDDKVMKQLK  
RRRYTGWGRLSRKLINGIRDKQSGKTILDFLKSDFANRNFMLIHDDSLTFKEDIQKAQVS  
GQGDSLHEHIANLAGSPAIKKGILQTVKVVDELVKVMGRHKPENIVIEMARENQTTQKGQKN  
SRERMKRIEEGIKELGSQILKEHPVENTQLQNEKLYLYLQNGRDMYVDQELDINRLSDYDV  
DHIVPQSFLKDDSIDNKVLTRSDKNRGKSDNVPSEEVVKKMKNYWRQLLNAKLITQRKFDNL  
TKAERGGELSELDKAGFIKRQLVETRQITKHVAQILDSRMNTKYDENDKLIREVKVITLKS KL  
VSDFRKDFQFYKVREINNYHHAHADAYLNAVVG TALIKKYPKLESEFVYGDYKVYDVRKMIAK  
SEQEIGKATAKYFFYSNIMNFFKTEITLANGEIRKRPLIETNGETGEIVWDKGRDFATVRKV  
LSMPQVNIVKKTEVQTGGFSKESILPKRNSDKLIARKKDWDPKKYGGFDSPTVAYSVLV VAK  
VEKGKSKKLKSVKELLGITIMERSSEKNPIDFLEAKGYKEVKKDLI IKLPKYSLFELENGR  
KRMLASAGELQKGNELALPSKYVNFLYLASHYEKLGKSPEDNEQKQLFVEQHKKHYLDEIEEQ  
ISEFSKRVI LADANLDKVL SAYNKHRDKPIREQAENI IHLFTLTNLGAPAAF KYFDTTIDRK  
RYTSTKEVL DATLIHQSI TGLYETRIDLSQLGGDSGGSKRTADGSEFEP KKKRKV GSGATNF  
SLLKQAGDVEENPGPMVSKGEELFTGVVPI LVELDGDVNGHKFSVSGEGEGDATY GKLTLKF  
ICTTGKLPVPWPTLVTTLTLYGVQCFSRYPDHMKQHDFFKSAMP EGYVQERTIFFKDDGNYKT  
RAEVKFE GDTLVNRIELK GIDFKEDGNILGHKLEYNYNSHN VYIMADKQKNGIKVNFKIRHN  
IEDGSVQLADHYQQNTPIGDGPVLLPDNHYLSTQSALS KDPNEKRDH MVLLEFVTAAGITLG  
MDELYKSGGSP KKKRKV



**ABE7.10(monomer)**

MKRTADGSEFESP KKKRKVSEVEFSHEYWMRHALTLAKRARDEREVPVGAVLVLNNRVIGEG  
WNRAIGLHDPHTAHAEIMALRQGGGLVMQNYRLIDATLYVTFEPCVMCAGAMIHSRIGRVVFGV  
RNAKTGAAGSLMDVLHYPGMNHRVEITEGILADECAALLCYFFRMPRQVFNAQKKAQSSTDS  
GGSSGGSSGSETPGTSESATPESGGSSGGSDKKYSIGLAIGTNSVGVAVITDEYKVP SKKF  
KVLGNTDRHSIKKNLIGALLFDSGETAEATRLKRTARRRYTRRKNRICYLQEIFS NEMAKVD  
DSFFHRLEESFLVEEDKKHERHPIFGNIVDEVAYHEKYPTIYHLRKKLVDSTDKADLRLIYL  
ALAHMIKFRGHFLIEGDLNPDNSDVKLFIQLVQTYNQLFEENPINASGVDAKAILSARLSK  
SRLENLIAQLPGEKKNLFGNLIASLGLTPNFKSNFDLAEDAKLQLSKD TYDDDLNLLA  
QIGDQYADLFLAAKNLSDAILLSDILRVNTEITKAPLSASMIKRYDEHHQDLTLLKALVRQQ  
LPEKYKEIFFDQSKNGYAGYIDGGASQEEFYKFIKPILEKMDGTEELLVKLNREDLLRKQRT  
FDNGSIPHQIHLGELHAILRRQEDFPFLKDNREKIEKILTFRIPIYVGPLARGNSRFAWMT  
RKSEETITPWNFEEVVDKGASAQSFIERMTNFDKNLPNEKVLPKHSLLEYFTVYNELTKVK  
YVTEGMRKPAFLSGEQKKAIVDLLFKTNRKVTVKQLKEDYFKKIECFDSVEISGVEDRFNAS  
LGTYHDLLKIIKDKDFLDNEENEDILEDIVLTLTLFEDREMIEERLKYAHLFDDKVMKQLK  
RRRYTGWGRLSRKLINGIRDKQSGKTILDFLKSDFANRNFMQLIHDDSLTFKEDIQKAQVS  
GQGDSLHEHIANLAGSPAIKKGILQTVKVVDELVKVMGRHKPENIVIEMARENQTTQKGQKN  
SRERMKRIEEGIKELGSQILKEHPVENTQLQNEKLYLYLQNGRDMYVDQELDINRLSDYDV  
DHIVPQSFLKDDSIDNKVLTRSDKNRGKSDNVPSEEVVKKMKNYWRQLLNAKLITQRKFDNL  
TKAERGGELSELDKAGFIKRQLVETRQITKHVAQILD SRMNTKYDENDKLIREVKVITLKS KL  
VSDFRKDFQFYKVREINNYHHAHDAYLNAVVG TALIKKYPKLESEFVYGDYKVYDVRKMIAK  
SEQEIGKATAKYFFYSNIMNFFKTEITLANGEIRKRPLIETNGETGEIVWDKGRDFATVRKV  
LSMPQVNIVKKTEVQTGGFSKESILPKRNSDKLIARKKDWDPKKYGGFDSPTVAYSVLVVAK  
VEKGKSKKLKSVKELLGITIMERSSEKNPIDFLEAKGYKEVKKDLI IKLPKYSLFELENGR  
KRMLASAGELQKGNELALPSKYVNFLYLASHYEKLGKSPEDNEQKQLFVEQHKHYLDEIEEQ  
ISEFSKRVI LADANLDKVL SAYNKHRDKPIREQAENI IHLFTLTNLGAPAAF KYFDTTIDRK  
RYTSTKEVLDATLIHQSI TGLYETRIDLSQLGGDSGGSKRTADGSEFEP KKKRKV GSGATNF  
SLLKQAGDVEENPGPMVSKGEELFTGVVPI LVELDGDVNGHKFSVSGEGEGDATY GKLTLKF  
ICTTGKLPVPWPPTLVTTLTLYGVQCFSRYPDHMKQHDFFKSAMPEGYVQERTIFFKDDGNYKT  
RAEVKFEGDTLVNRIELKGI DFKEDGNILGHKLEYNYNSHNVYIMADKQKNGIKVNFKIRHN  
IEDGSVQLADHYQQNTPIGDGPVLLPDNHYLSTQSALS KDPNEKRDH MVLLEFVTAAGITLG  
MDELYKSGGSPKKR KV

**ABE7.10(monomer, N108D)**

MKRTADGSEFESP KKKRKVSEVEFSHEYWMRHALTLAKRARDEREVPVGAVLVLNNRVIGEG  
WNRAIGLHDPTAHAEIMALRQGGLVMQNYRLIDATLYVTFEPCVMCAGAMIHSRIGRVVFGV  
RDAKTGAAGSLMDVLHYPGMNRVEITEGILADECAALLCYFFRMPRQVFNAQKKAQSSTDS  
GGSSGGSSGSETPGTSESATPESGGSSGGSDKKYSIGLAIGTNSVGVAVITDEYKVP SKKF  
KVLGNTDRHSIKKNLIGALLFDSGETAEATRLKRTARRRYTRRKNRICYLQEIFS NEMAKVD  
DSFFHRLEESFLVEEDKKHERHPIFGNIVDEVAYHEKYPTIYHLRKKLVDSTDKADLRLIYL  
ALAHMIKFRGHFLIEGDLNPDNSDVKLFIQLVQTYNQLFEENPINASGVDAKAILSARLSK  
SRLENLIAQLPGEKKNGLFGNLIASLGLTPNFKSNFDLAEDAKLQLSKD TYDDDLNLLA  
QIGDQYADLFLAAKNLSDAILLSDILRVNTEITKAPLSASMIKRYDEHHQDLTLLKALVRQQ  
LPEKYKEIFFDQSKNGYAGYIDGGASQEEFYKFIKPILEKMDGTEELLVKLNREDLLRKQRT  
FDNGSIPHQIHLGELHAILRRQEDFPFLKDNREKIEKILTFRIPIYVGPLARGNSRFAWMT  
RKSEETITPWNFEEVVDKGASAQSFIERMTNFDKNLPNEKVLPKHSLLEYEFTVYNELTKVK  
YVTEGMRKPAFLSGEQKKAIVDLLFKTNRKVTVKQLKEDYFKKIECFDSVEISGVEDRFNAS  
LGT YHDLKI IKDKDFLDNEENEDILEDIVLTLTLFEDREMIEERLKYAHLFDDKVMKQLK  
RRRYTGWGRLSRKLINGIRDKQSGKTILDFLKSDFANRNFMLIHDDSLTFKEDIQKAQVS  
GQGDSLHEHIANLAGSPA IKKGILQTVKVVDELVKVMGRHKPENIVIEMARENQTTQKGQKN  
SRERMKRIEEGIKELGSQILKEHPVENTQLQNEKLYLYLQNGRDMYVDQELDINRLSDYDV  
DHIVPQSFLKDDSIDNKVLRSDKNRGKSDNVPSEEVVKKMKNYWRQLLNAKLITQRKFDNL  
TKAERGGSELDKAGFIKRQLVETRQITKHVAQILDSRMNTKYDENDKLIREVKVITLKS KL  
VSDFRKDFQFYKVREINNYHHAHDAYLNAVVG TALIKKYPKLESEFVYGDYKVYDVRKMIAK  
SEQEIGKATAKYFFYSNIMNFFKTEITLANGEIRKRPLIETNGETGEIVWDKGRDFATVRKV  
LSMPQVNIVKKTEVQTGGFSKESILPKRNSDKLIARKKDWDPKKYGGFDSPTVAYSVLV VAK  
VEKGKSKKLKSVKELLGITIMERSSSF EKNPIDFLEAKGYKEVKKDLI IKLPKYSLFELENGR  
KRMLASAGELQKGNELALPSKYVNFLYLASHYEKLGKSPEDNEQKQLFVEQHKKHYLDEIEEQ  
ISEFSKR VILADANLDKVL SAYNKHRDKPIREQAENI IHLFTLTNLGAPAAF KYFDTTIDRK  
RYTSTKEVLDATLIHQSI TGLYETRIDLSQLGGDSGGSKRTADGSEFEP KKKRKV GSGATNF  
SLLKQAGDVEENPGPMVSKGEELFTGVVPI LVELDGDVNGHKFSVSGEGEGDATY GKLTLKF  
ICTTGKLPVPWPTLVTTLTLYGVQCFSRYPDHMKQHDFFKSAMPEGYVQERTIFFKDDGNYKT  
RAEVKFE GDTLVNRIELKGI DFKEDGNILGHKLEYNYNSHNVIYIMADKQKNGIKVNFKIRHN  
IEDGSVQLADHYQQNTPIGDGPVLLPDNHYLSTQSALS KDPNEKRDHMLLEFVTAAGITLG  
MDELYKSGGSPKKRKV

## ABE7.10(dimer)

MKRTADGSEFESPKKKRKVSEVEFSHEYWMRHALTLAKRAWDEREVPVGAVLVHNNRVIGEG  
WNRPIGRHDPTAHAEIMALRQGGLVMQNYRLIDATLYVTLEPCVMCAGAMIHSRIGRVVFGA  
RDAKTGAAGSLMDVLHHPGMNHRVEITEGILADECAALLSDFFRMRQEIKAQKKAQSSTDS  
GGSSGGSSGSETPGTSESATPESGGSSGGSSSEVEFSHEYWMRHALTLAKRARDEREVPVGA  
VLVLNNRVIGEGWNRAIGLHDPTAHAEIMALRQGGLVMQNYRLIDATLYVTFEPCVMCAGAM  
IHSRIGRVVFGVRNAKTGAAGSLMDVLHYPGMNHRVEITEGILADECAALLCYFFRMPRQVF  
NAQKKAQSSTDSGGSSGGSSGSETPGTSESATPESGGSSGGSSDKKYSIGLAIGTNSVGWAV  
ITDEYKVPSSKFKVLGNTDRHSIKKNLIGALLFDSGETAEATRLKRTARRRYTRRKNRICYL  
QEIFSNEMAKVDDSFHRLEESFLVEEDKKHERHPIFGNIVDEVAYHEKYPTIYHLRKKLVD  
STDKADLRLIYLALAHMIKFRGHFLIEGDLNPDNSDVKLFIQLVQTYNQLFEEENPINASGV  
DAKAILSARLSKSRLENLIAQLPGEKKNGLFGNLIALSGLTPNFKSNFDLAEDAKLQLSK  
DTYDDDLNLLAQIGDQYADLFLAAKNLSDAILLSDILRVNTEITKAPLSASMIKRYDEHHQ  
DLTLLKALVRQQLPEKYKEIFFDQSKNGYAGYIDGGASQEEFYKFIKPILEKMDGTEELLVK  
LNREDLLRKQRTFDNGSIPHQIHLGELHAILRRQEDFYPFKDNREKIEKILTFRIPIYYVGP  
LARGNSRFAMTRKSEETITPWNFEEVVDKGASAQSFIERMTNFDKNLPNEKVLPHKSLLYE  
YFTVYNELTKVKYVTEGMRKPAFLSGEQKKAIVDLLFKTNRKVTVKQLKEDYFKKIECFDSV  
EISGVEDRFNASLGTYHDLLKI IKDKDFLDNEENEDILEDIVLTLTLFEDREMIEERLKYA  
HLFDDKVMKQLKRRRYTGWGRLSRKLINGIRDKQSGKTILDFLKSDGFANRNFMQLIHDDSL  
TFKEDIQKAQVSGQGDSLHEHIANLAGSPAIKKGILOTVKVVDELVKVMGRHKPENIVIEMA  
RENQTTQKGQKNSRERMKRIEEGIKELGSQILKEHPVENTQLQNEKLYLYLQNGRDMYVDQ  
ELDINRLSDYDVDHIVPQSFLKDDSIDNKVLRSDKNRGKSDNVPSEEVVKKMKNYWRQLLN  
AKLITQRKFDNLTKAERGGLSELKAGFIKRQLVETRQITKHVAQILDSRMNTKYDENDKLI  
REVKVITLKSCLVSDFRKDFQFYKVREINNYHHAHDAYLNAVVGTAIHKYPKLESEFVYGD  
YKVYDVRKMIKSEQEIGKATAKYFFYSNIMNFFKTEITLANGEIRKRPLIETNGETGEIVW  
DKGRDFATVRKVL SMPQVNI VVKTEVQTGGFSKESILPKRNSDKLIARKKDWDPKKYGGFDS  
PTVAYSVLVVAKEKGSKLLKSVKELLGITIMERSSEKNPIDFLEAKGYKEVKKDLI IKL  
PKYSLFELENGRKRMLASAGELQKGNELALPSKYVNFYLYLASHYEKLGKSPEDNEQKQLFVE  
QHKHYLDEIEQISEFSKRVI LADANLDKVL SAYNKH RDKPIREQAENI IHLFTLTNLGAPA  
AFKYFDTTIDRKRYTSTKEVL DATLIHQ SITGLYETRIDLSQLGGSSGSKRTADGSEFEPK  
KKRKV GSGATNFSLLKQAGDVEENPGPMVSKGEELFTGVVPI LVELDGDVNGHKFSVSGEGE  
GDATYGLTLTKFICTTGKLPVPWPTLVTTLTLYGVQCFSRYPDHMKQHDFFKSAMPEGYVQER  
TIFFKDDGNYKTRAEVKFEGDTLVNRIELKGI DFKEDGNILGHKLEYNYNSHNVYIMADKQK  
NGIKVNFKIRHNIEDGSVQLADHYQQNTPIGDGPVLLPDNHYLSTQSALS KDPNEKRDMVL  
LEFVTAAGITLGMDELYKSGGSPKKKRKV

**ABE7.10(dimer, N108D)**

MKRTADGSEFESPKKKRKVSEVEFSHEYWMRHALTLAKRAWDEREVPVGAVLVHNNRVIGEG  
WNRPIGRHDPTAHAEIMALRQGGLVMQNYRLIDATLYVTLEPCVMCAGAMIHSRIGRVVFGA  
RDAKTGAAGSLMDVLHHPGMNHRVEITEGILADECAALLSDFFRMRQEIKAQKKAQSSTDS  
GGSSGGSSGSETPGTSESATPESGGSSGGSSEVEFSHEYWMRHALTLAKRARDEREVPVGA  
VLVLNNRVIGEGWNRRAIGLHDPTAHAEIMALRQGGLVMQNYRLIDATLYVTFEPCVMCAGAM  
IHSRIGRVVFGVRDAKTGAAGSLMDVLHYPGMNHRVEITEGILADECAALLCYFFRMPRQVF  
NAQKKAQSSTDSGGSSGGSSGSETPGTSESATPESGGSSGGSDDKYSIGLAIGTNSVGWAV  
ITDEYKVPSSKFKVLGNTDRHSIKKNLIGALLFDSGETAEATRLKRTARRRYTRRKNRICYL  
QEIFSNEMAKVDDSFHRLEESFLVEEDKKHERHPIFGNIVDEVAYHEKYPTIYHLRKKLVD  
STDKADLRLIYLALAHMIKFRGHFLIEGDLNPDNSVDKLFIQLVQTYNQLFEEENPINASGV  
DAKAILSARLSKSRLENLIAQLPGEKKNGLFGNLIALSGLTPNFKSNFDLAEDAQLQLSK  
DTYDDDLNLLAQIGDQYADLFLAAKNLSDAILLSDILRVNTEITKAPLSASMIKRYDEHHQ  
DLTLLKALVRQQLPEKYKEIFFDQSKNGYAGYIDGGASQEEFYKFIKPILEKMDGTEELLVK  
LNREDLLRKQRTFDNGSIPHQIHLGELHAILRRQEDFYPFKDNREKIEKILTFRIPYVGP  
LARGNSRFAMTRKSEETITPWNFEEVVDKGASAQSFIERMTNFDKNLPNEKVLPHKSLLYE  
YFTVYNELTKVKYVTEGMRKPAFLSGEQKKAIVDLLFKTNRKVTVKQLKEDYFKKIECFDSV  
EISGVEDRFNASLGTYHDLLKI IKDKDFLDNEENEDILEDIVLTLTLFEDREMIEERLKYA  
HLFDDKVMKQLKRRRYTGWGRLSRKLINGIRDKQSGKTILDFLKSDGFANRNFMQLIHDDSL  
TFKEDIQKAQVSGQGDSLHEHIANLAGSPAIKKGILOTVKVVDELVKVMGRHKPENIVIEMA  
RENQTTQKGQKNSRERMKRIEEGIKELGSQILKEHPVENTQLQNEKLYLYLQNGRDMYVDQ  
ELDINRLSDYDVDHIVPQSFLKDDSIDNKVLRSDKNRGKSDNVPSEEVVKKMKNYWRQLLN  
AKLITQRKFDNLTKAERGGLSELKAGFIKRQLVETRQITKHVAQILDSRMNTKYDENDKLI  
REVKVITLKSCLVSDFRKDFQFYKVREINNYHHAHDAYLNAVVGTAIHKYPKLESEFVYGD  
YKVYDVRKMIKSEQEIGKATAKYFFYSNIMNFFKTEITLANGEIRKRPLIETNGETGEIVW  
DKGRDFATVRKVLSPQVNIKKTEVQTTGGFSKESILPKRNSDKLIARKKDWDPKKYGGFDS  
PTVAYSVLVVAKEKGSKLLKSVKELLGITIMERSSEKNPIDFLEAKGYKEVKKDLI IKL  
PKYSLFELENGRKRMLASAGELQKGNELALPSKYVNFYLYLASHYEKLGKSPEDNEQKQLFVE  
QHKHYLDEIEQISEFSKRVI LADANLDKVL SAYNKHDKPIREQAENI IHLFTLTNLGAPA  
AFKYFDTTIDRKRYTSTKEVL DATLIHQSI TGLYETRIDLSQLGGSSGSKRTADGSEFEPK  
KKRKVSGGATNFSLLKQAGDVEENPGPMVSKGEEELFTGVVPI LVELDGDVNGHKFSVSGEGE  
GDATYGKLTLLKFICTTGKLPVPWPTLVTTLTLYGVQCFSRYPDHMKQHDFFKSAMPEGYVQER  
TIFFKDDGNYKTRAEVKFEGDTLVNRIELKGI DFKEDGNILGHKLEYNYNSHNVYIMADKQK  
NGIKVNFKIRHNIEDGSVQLADHYQQNTPIGDGPVLLPDNHYLSTQSALS KDPNEKRDMVL  
LEFVTAAGITLGMDELYKSGGSPKKRKV
